# Supplementary material
Source: PubMed Central journal article supplement (PMC7223005)
Supplement: 11306_2020_1658_MOESM1_ESM.pdf [file 11306_2020_1658_MOESM1_ESM.pdf]

## Electronic Supplementary Material

### New markers for sepsis caused by *Pseudomonas aeruginosa* during burn infection

Moamen M. Elmassry<sup>1</sup>, Nithya S. Mudaliar<sup>2\*</sup>, Jane A. Colmer-Hamood<sup>3,4</sup>, Michael J. San Francisco<sup>1,5</sup>, John A. Griswold<sup>2</sup>, Sharmila Dissanaik<sup>2</sup>, and Abdul N. Hamood<sup>2,3,†</sup>

<sup>1</sup>Department of Biological Sciences, Texas Tech University, Lubbock, TX, USA

<sup>2</sup>Department of Surgery, Texas Tech University Health Sciences Center, Lubbock, TX, USA

<sup>3</sup>Department of Immunology and Molecular Microbiology, Texas Tech University Health Sciences Center, Lubbock, TX, USA

<sup>4</sup>Department of Medical Education, Texas Tech University Health Sciences Center, Lubbock, TX, USA

<sup>5</sup>Honors College, Texas Tech University, Lubbock, TX, USA

\*NM, current address: Caris Life Sciences, Phoenix, AZ, USA

†Corresponding author: Abdul N. Hamood, PhD; [abdul.hamood@ttuhsc.edu](mailto:abdul.hamood@ttuhsc.edu)

### Online Resource 1: Table S1 Determination of *P. aeruginosa* systemic infection

| Sample | Groups of Mice                       |                               |                      |                           |
|--------|--------------------------------------|-------------------------------|----------------------|---------------------------|
|        | Thermally injured and infected (B-I) | Thermally injured only (B-NI) | Infected only (NB-I) | Sham <sup>a</sup> (NB-NI) |
| Blood  | ~400 CFU/mL <sup>b</sup>             | NG                            | NG                   | NG                        |
| Liver  | 125,333 ± 13,860 CFU/g <sup>c</sup>  | NG                            | NG                   | NG                        |
| Spleen | 103,000 ± 17,320 CFU/g <sup>c</sup>  | NG                            | NG                   | NG                        |

CFU, colony forming units; NG, no growth

<sup>a</sup>Mice were neither thermally injured nor infected.

<sup>b</sup>Ten µL of whole blood was plated to LB agar and *Pseudomonas* isolation agar; as the blood was clotting, the quantification is approximate.

<sup>c</sup>Livers and spleens were individually weighed and homogenized in 1 mL PBS; the homogenates were serially diluted tenfold in PBS, and 10 µL of the dilutions plated on LB and *Pseudomonas* isolation agar to determine CFU present in the tissue. Values represent the means of three animals ± SEM.
