# Supplementary material
Source: PubMed Central journal article supplement (PMC7223005)
Supplement: 11306_2020_1658_MOESM2_ESM.pdf [file 11306_2020_1658_MOESM2_ESM.pdf]

**Electronic Supplementary Material**

**New markers for sepsis caused by *Pseudomonas aeruginosa* during burn infection**

Moamen M. Elmassy<sup>1</sup>, Nithya S. Mudaliar<sup>2\*</sup>, Jane A. Colmer-Hamood<sup>3,4</sup>, Michael J. San Francisco<sup>1,5</sup>, John A. Griswold<sup>2</sup>, Sharmila Dissanaik<sup>2</sup>, and Abdul N. Hamood<sup>2,3,†</sup>

<sup>1</sup>Department of Biological Sciences, Texas Tech University, Lubbock, TX, USA; <sup>2</sup>Department of Surgery, Texas Tech University Health Sciences Center, Lubbock, TX, USA; <sup>3</sup>Department of Immunology and Molecular Microbiology, Texas Tech University Health Sciences Center, Lubbock, TX, USA; <sup>4</sup>Department of Medical Education, Texas

Tech University Health Sciences Center, Lubbock, TX, USA; <sup>5</sup>Honors College, Texas Tech University, Lubbock, TX, USA; \*NM, current address: Caris Life Sciences, Phoenix, AZ, USA

†Corresponding author: Abdul N. Hamood, PhD, [abdul.hamood@ttuhsc.edu](mailto:abdul.hamood@ttuhsc.edu)

**Online Resource 2 Metabolites identified by their mass spectra (148 out of 532 primary metabolites detected among all groups of sera tested)**

| Metabolite                                 | Groups of Mice (n = 3)             |            |            |                                         |            |            |                               |            |            |              |            |            | P-value | Fisher's LSD test P <0.05 |             |              |              |               |               |   |   |
|--------------------------------------------|------------------------------------|------------|------------|-----------------------------------------|------------|------------|-------------------------------|------------|------------|--------------|------------|------------|---------|---------------------------|-------------|--------------|--------------|---------------|---------------|---|---|
|                                            | Thermally Injured / Infected (B-I) |            |            | Thermally Injured / Not Infected (B-NI) |            |            | Not Injured / Infected (NB-I) |            |            | Sham (NB-NI) |            |            |         | B-I vs B-NI               | B-I vs NB-I | B-I vs NB-NI | B-NI vs NB-I | B-NI vs NB-NI | NB-I vs NB-NI |   |   |
|                                            | B-I 1                              | B-I 2      | B-I 3      | B-NI 1                                  | B-NI 2     | B-NI 3     | NB-I 1                        | NB-I 2     | NB-I 3     | NB-NI 1      | NB-NI 2    | NB-NI 3    |         |                           |             |              |              |               |               |   |   |
| 1,3,5-Trimethylcyanuric acid               | 63789.55                           | 80354.82   | 71067.53   | 88730.69                                | 79464.21   | 75905.37   | 74746.18                      | 86820.19   | 48631.03   | 89338.78     | 73762.75   | 95901.18   | ≥ 0.05  |                           |             |              |              |               |               |   |   |
| 1-Methylinosine                            | 80088.41                           | 53361.48   | 23144.61   | 48635.75                                | 47737.88   | 29221.47   | 95072.26                      | 49741.07   | 36399.83   | 98060.53     | 38599.61   | 13107.35   | ≥ 0.05  |                           |             |              |              |               |               |   |   |
| 1-Monoolein                                | 6274.58                            | 6706.64    | 12758.14   | 12530.94                                | 7309.34    | 13433.33   | 18934.96                      | 21689.17   | 12819.75   | 20068.37     | 2898.37    | 14255.19   | ≥ 0.05  |                           |             |              |              |               |               |   |   |
| 2-Deoxy-D-ribitol                          | 1756.13                            | 1791.75    | 2075.46    | 1863.49                                 | 2394.83    | 1041.70    | 2640.00                       | 2180.84    | 1708.50    | 1925.95      | 1803.63    | 1476.90    | ≥ 0.05  |                           |             |              |              |               |               |   |   |
| 2-Hydroxybutyric acid                      | 33628.65                           | 30610.99   | 180316.85  | 31767.01                                | 25414.83   | 37666.81   | 35803.92                      | 41278.60   | 26613.06   | 33281.06     | 37221.93   | 27830.14   | ≥ 0.05  |                           |             |              |              |               |               |   |   |
| 2-Hydroxyglutaric acid                     | 1540.45                            | 1554.74    | 1847.46    | 1643.12                                 | 1221.98    | 1110.55    | 1800.69                       | 2068.47    | 885.33     | 2436.40      | 1145.15    | 1639.50    | ≥ 0.05  |                           |             |              |              |               |               |   |   |
| 3,4-Dihydroxybutyric acid                  | 2963.16                            | 2931.96    | 2343.17    | 3947.34                                 | 2919.85    | 2364.78    | 3201.89                       | 4053.89    | 2621.90    | 2385.35      | 2870.59    | 3365.60    | ≥ 0.05  |                           |             |              |              |               |               |   |   |
| <b>3,6-Anhydro-D-galactose<sup>a</sup></b> | 696.52                             | 1017.31    | 1073.87    | 1981.16                                 | 1802.26    | 1507.67    | 2224.38                       | 1345.44    | 1790.71    | 1949.51      | 1796.43    | 1743.41    | 0.0016  | ***                       | ***         | ***          |              |               |               |   |   |
| 3-Aminoisobutyric acid                     | 27604.38                           | 19655.64   | 2906.05    | 15652.44                                | 13807.09   | 23954.10   | 25819.94                      | 25775.31   | 23848.79   | 38959.76     | 13860.10   | 17288.84   | ≥ 0.05  |                           |             |              |              |               |               |   |   |
| 3-Hydroxybutyric acid                      | 93644.75                           | 32849.46   | 88176.10   | 43185.42                                | 56269.19   | 261041.50  | 63524.42                      | 82187.86   | 69494.96   | 68634.32     | 43791.36   | 41628.31   | ≥ 0.05  |                           |             |              |              |               |               |   |   |
| <b>3-Phosphoglycerate</b>                  | 2843.45                            | 4609.60    | 6710.90    | 1669.86                                 | 1073.58    | 314.31     | 1281.16                       | 349.79     | 824.17     | 457.44       | 451.68     | 411.80     | 0.0028  | ***                       | ***         | ***          |              |               | †             | † |   |
| 3-Ureidopropionate                         | 3279.76                            | 3569.85    | 5057.86    | 786.26                                  | 1718.34    | 2922.55    | 2809.48                       | 1886.74    | 853.25     | 1195.62      | 2627.77    | 1309.48    | ≥ 0.05  |                           |             |              |              |               |               |   |   |
| 4-Hydroxybutyric acid                      | 10321.10                           | 10925.11   | 8165.45    | 8536.53                                 | 8420.78    | 7311.85    | 13825.45                      | 8986.18    | 11746.93   | 8888.63      | 9352.55    | 7991.60    | ≥ 0.05  |                           |             |              |              |               |               |   |   |
| <b>4-Methylbenzenesulfonamide</b>          | 3722.01                            | 2615.94    | 2336.04    | 1509.40                                 | 2011.04    | 1654.35    | 1994.37                       | 2184.75    | 2319.11    | 1671.71      | 1751.16    | 1746.30    | 0.0221  | †                         | †           | †            | †            |               |               | † |   |
| 5-Methoxytryptamine                        | 15594.43                           | 31281.07   | 9595.58    | 22324.41                                | 33857.10   | 45025.56   | 95137.83                      | 38534.96   | 58024.76   | 61952.39     | 32592.98   | 71135.48   | ≥ 0.05  |                           |             |              |              |               |               |   |   |
| <b>5-Oxoproline</b>                        | 1234375.10                         | 1368105.65 | 1537910.37 | 996585.19                               | 1083531.75 | 680929.21  | 630935.62                     | 964068.80  | 705864.33  | 896723.42    | 1064958.64 | 910062.51  | 0.0102  | †                         | †           | †            | †            |               |               | † |   |
| Alanine                                    | 1627042.71                         | 1523757.04 | 2274044.95 | 2378012.73                              | 2163086.45 | 1531809.52 | 2117831.25                    | 2228189.26 | 2154259.53 | 2490158.99   | 2008341.26 | 1539426.87 | ≥ 0.05  |                           |             |              |              |               |               |   |   |
| Allantoic acid                             | 30642.73                           | 64991.78   | 39370.67   | 5795.47                                 | 38752.17   | 38920.05   | 28536.61                      | 42219.62   | 21159.71   | 42271.77     | 43014.55   | 53957.28   | ≥ 0.05  |                           |             |              |              |               |               |   |   |
| α-Aminoadipic acid                         | 1756.13                            | 2437.45    | 1106.44    | 2255.01                                 | 1357.07    | 774.29     | 2222.36                       | 1396.24    | 1142.01    | 2307.80      | 421.84     | 1642.39    | ≥ 0.05  |                           |             |              |              |               |               |   |   |
| α-Ketoglutarate                            | 8746.02                            | 11885.85   | 3359.01    | 5990.55                                 | 368.43     | 835.16     | 3933.27                       | 2657.65    | 2615.89    | 3459.25      | 4742.13    | 2099.41    | ≥ 0.05  |                           |             |              |              |               |               |   |   |
| <b>α-Tocopherol<sup>b</sup></b>            | 3450.92                            | 4293.58    | 2243.41    | 2118.09                                 | 2361.05    | 7170.17    | 12931.66                      | 9808.88    | 7226.02    | 15531.29     | 6002.51    | 9151.96    | 0.0380  |                           | †           | †            | †            |               | †             |   |   |
| Altrose                                    | 3373650.47                         | 3421104.90 | 3259423.31 | 3832180.48                              | 4294798.63 | 4176549.32 | 1559239.88                    | 4206973.74 | 5167129.54 | 2225878.71   | 3777378.54 | 4693674.57 | ≥ 0.05  |                           |             |              |              |               |               |   |   |
| Aminomalate                                | 7439.06                            | 11670.29   | 8725.29    | 11670.29                                | 12053.96   | 7131.25    | 5345.57                       | 12828.05   | 9714.58    | 10369.90     | 1077.24    | 9608.98    | ≥ 0.05  |                           |             |              |              |               |               |   |   |
| Arabitol                                   | 7402.46                            | 5529.37    | 4190.62    | 13426.31                                | 14587.97   | 3955.27    | 10713.33                      | 9919.29    | 6666.55    | 10046.94     | 7226.88    | 8693.01    | ≥ 0.05  |                           |             |              |              |               |               |   |   |
| Arachidic acid                             | 5468.24                            | 7963.89    | 3410.92    | 8286.21                                 | 7330.83    | 9100.90    | 13077.93                      | 8793.70    | 7843.65    | 7807.86      | 5214.38    | 6865.89    | ≥ 0.05  |                           |             |              |              |               |               |   |   |
| Arachidonic acid                           | 71683.73                           | 60474.85   | 46344.19   | 117389.04                               | 62931.72   | 201118.84  | 211089.99                     | 155744.22  | 69578.18   | 158382.45    | 130788.64  | 173567.72  | ≥ 0.05  |                           |             |              |              |               |               |   |   |
| Asparagine                                 | 9298.09                            | 8518.88    | 12733.71   | 14521.50                                | 14521.50   | 11713.13   | 14253.33                      | 14096.30   | 12820.75   | 6340.32      | 11558.48   | 12253.92   | ≥ 0.05  |                           |             |              |              |               |               |   |   |
| Aspartate (aspartic acid)                  | 137703.32                          | 102453.77  | 28145.47   | 85780.35                                | 106517.55  | 58105.68   | 41595.37                      | 75759.91   | 40304.11   | 54114.11     | 47481.96   | 50658.08   | ≥ 0.05  |                           |             |              |              |               |               |   |   |
| Benzoate (benzoic acid)                    | 38273.73                           | 35751.19   | 32242.44   | 77709.16                                | 101418.82  | 54194.31   | 41114.18                      | 15073.38   | 29052.49   | 71549.75     | 49000.60   | 7970.44    | ≥ 0.05  |                           |             |              |              |               |               |   |   |
| β-Alanine                                  | 100598.03                          | 105217.96  | 64645.71   | 101030.57                               | 99454.86   | 84285.86   | 89404.88                      | 95246.50   | 65757.12   | 98794.79     | 82834.41   | 110750.98  | ≥ 0.05  |                           |             |              |              |               |               |   |   |
| β-Glutamic acid                            | 8543.20                            | 8467.18    | 9272.91    | 7975.98                                 | 8746.23    | 5417.04    | 6317.03                       | 8668.63    | 6181.27    | 6613.22      | 8142.59    | 9908.20    | ≥ 0.05  |                           |             |              |              |               |               |   |   |
| β-Glycerolphosphate                        | 727.19                             | 948.06     | 364.40     | 1034.44                                 | 1032.64    | 940.92     | 4716.09                       | 1090.42    | 2111.56    | 871.68       | 1730.58    | 1352.78    | ≥ 0.05  |                           |             |              |              |               |               |   |   |
| β-Sitosterol                               | 7226.35                            | 7343.56    | 7710.46    | 5260.98                                 | 10618.08   | 4525.01    | 5793.47                       | 5561.53    | 11310.78   | 6495.42      | 4967.45    | 4245.00    | ≥ 0.05  |                           |             |              |              |               |               |   |   |
| Butane-2,3-diol NIST                       | 31881.42                           | 32653.41   | 22356.77   | 18139.31                                | 34155.95   | 20662.37   | 20685.21                      | 31427.70   | 16097.38   | 33017.00     | 26916.63   | 33032.48   | ≥ 0.05  |                           |             |              |              |               |               |   |   |
| Capric acid                                | 4846.92                            | 5612.27    | 4188.59    | 4898.34                                 | 4694.47    | 6025.69    | 4447.75                       | 4735.90    | 3590.45    | 5017.09      | 4311.02    | 5446.72    | ≥ 0.05  |                           |             |              |              |               |               |   |   |
| <b>Cholesterol</b>                         | 790575.91                          | 875427.11  | 822959.95  | 464204.25                               | 639882.09  | 363877.40  | 360934.41                     | 331040.73  | 590957.82  | 642072.88    | 348764.89  | 290661.19  | 0.0267  | †                         | †           | †            |              |               | †             |   |   |
| cis-Aconitate (cis-aconitic acid)          | 2236.96                            | 1467.93    | 1177.69    | 1869.91                                 | 2913.70    | 1775.08    | 3635.67                       | 1926.80    | 3281.64    | 1759.07      | 1672.97    | 2141.74    | ≥ 0.05  |                           |             |              |              |               |               |   |   |
| cis-Gondoic acid                           | 640.12                             | 453.55     | 647.37     | 983.09                                  | 548.58     | 1613.44    | 1528.31                       | 993.69     | 985.59     | 756.83       | 856.03     | 1202.69    | ≥ 0.05  |                           |             |              |              |               |               |   |   |
| Citrate (citric acid)                      | 50354.91                           | 50961.10   | 25590.58   | 64049.64                                | 23319.87   | 59791.95   | 55586.26                      | 37430.87   | 34528.90   | 63562.26     | 30282.11   | 27944.64   | ≥ 0.05  |                           |             |              |              |               |               |   |   |
| Citramalate (citramalic acid)              | 1696.77                            | 3757.12    | 2416.45    | 2167.19                                 | 1941.45    | 2205.13    | 2615.79                       | 2503.27    | 1994.25    | 4236.70      | 1717.21    | 4043.91    | ≥ 0.05  |                           |             |              |              |               |               |   |   |
| Citrate (citric acid)                      | 407931.60                          | 308266.23  | 249750.68  | 331761.82                               | 339414.36  | 206875.13  | 519894.25                     | 380377.29  | 335815.10  | 425426.99    | 413552.69  | 427153.48  | ≥ 0.05  |                           |             |              |              |               |               |   |   |
| Citrulline                                 | 20378.03                           | 21457.15   | 23435.72   | 13933.37                                | 29772.60   | 19325.32   | 22787.52                      | 23762.53   | 23080.76   | 33075.90     | 19747.37   | 32750.90   | ≥ 0.05  |                           |             |              |              |               |               |   |   |
| <b>Conductril-β-epoxide<sup>b</sup></b>    | 2115.27                            | 1546.94    | 1073.87    | 3173.92                                 | 3128.62    | 2132.29    | 2115.43                       | 1587.75    | 1336.52    | 3413.11      | 2644.23    | 2664.19    | 0.0214  | †                         | †           | †            | †            |               |               | † |   |
| <b>Creatinine</b>                          | 133923.93                          | 109158.46  | 94295.61   | 67029.94                                | 49951.56   | 49666.31   | 25412.39                      | 43008.03   | 19770.05   | 39409.35     | 61717.60   | 32960.32   | 0.0019  | †                         | †           | †            | †            | †             | †             | † | † |
| Cysteine                                   | 3860.52                            | 3848.81    | 6697.67    | 5771.25                                 | 5404.73    | 1247.25    | 3269.48                       | 2948.82    | 1671.40    | 6171.48      | 6505.63    | 4216.13    | ≥ 0.05  |                           |             |              |              |               |               |   |   |
| Dodecanol                                  | 2002.48                            | 2235.55    | 1779.26    | 1897.72                                 | 1928.14    | 1748.14    | 2536.09                       | 2239.46    | 1903.01    | 1813.06      | 1681.20    | 1956.05    | ≥ 0.05  |                           |             |              |              |               |               |   |   |
| ε-Caprolactam                              | 6898.87                            | 7272.35    | 4974.39    | 8021.98                                 | 5608.40    | 5998.75    | 4338.80                       | 5811.66    | 3521.27    | 10004.73     | 5445.88    | 6389.63    | ≥ 0.05  |                           |             |              |              |               |               |   |   |
| Ethanolamine                               | 119940.19                          | 121894.83  | 125178.16  | 172456.07                               | 145088.57  | 122710.00  | 179325.26                     | 137133.82  | 95208.66   | 145556.09    | 194609.28  | 153974.53  | ≥ 0.05  |                           |             |              |              |               |               |   |   |
