# Supplementary material
Source: PubMed Central journal article supplement (PMC7223005)
Supplement: 11306_2020_1658_MOESM3_ESM.pdf [file 11306_2020_1658_MOESM3_ESM.pdf]

## Electronic Supplementary Material

### New markers for sepsis caused by *Pseudomonas aeruginosa* during burn infection

Moamen M. Elmassry<sup>1</sup>, Nithya S. Mudaliar<sup>2\*</sup>, Jane A. Colmer-Hamood<sup>3,4</sup>, Michael J. San Francisco<sup>1,5</sup>, John A. Griswold<sup>2</sup>, Sharmila Dissanaik<sup>2</sup>, and Abdul N. Hamood<sup>2,3,†</sup>

<sup>1</sup>Department of Biological Sciences, Texas Tech University, Lubbock, TX, USA; <sup>2</sup>Department of Surgery, Texas Tech University Health Sciences Center, Lubbock, TX, USA; <sup>3</sup>Department of Immunology and Molecular Microbiology, Texas Tech University Health Sciences Center, Lubbock, TX, USA; <sup>4</sup>Department of Medical Education, Texas Tech University Health Sciences Center, Lubbock, TX, USA; <sup>5</sup>Honors College, Texas Tech University, Lubbock, TX, USA; \*NM, current address: Caris Life Sciences, Phoenix, AZ, USA

†Corresponding author: Abdul N. Hamood, PhD; [abdul.hamood@ttuhsc.edu](mailto:abdul.hamood@ttuhsc.edu)

### Online Resource 3: Table 3 Classification and functional pathways for, or sources of, the 148 identified metabolites

| Metabolite                               | Synonyms                                                           | Class                                      | Pathway or source                                        |
|------------------------------------------|--------------------------------------------------------------------|--------------------------------------------|----------------------------------------------------------|
| <b>Purine Derivatives</b>                |                                                                    |                                            |                                                          |
| 1-methylinosine                          |                                                                    | modified nucleotide                        | purine metabolism                                        |
| allantoic acid                           | allantoate                                                         | <i>N</i> -carbamoyl- $\alpha$ amino acids  | purine metabolism (uric acid)                            |
| uric acid                                | urate                                                              | heterocyclic purine derivatives, xanthines | purine metabolism                                        |
| <b>Pyrimidines and Derivatives</b>       |                                                                    |                                            |                                                          |
| 3-aminoisobutyric acid                   | 3-amino-2-methylpropanoic acid, beta-aminoisobutyric acid          | beta amino acids                           | pyrimidine degradation                                   |
| <b>3-ureidopropionate<sup>a</sup></b>    | 3-ureidopropionate, <i>N</i> -carbamoyl- $\beta$ -alaninate        | ureas                                      | pyrimidine (uracil) metabolism                           |
| $\beta$ -alanine                         | 3-aminopropanoic acid, 3-aminopropionic acid                       | beta amino acids and derivatives           | pyrimidine metabolism; amino acid metabolism (Asp, His), |
| orotic acid                              | 6-carboxyuracil, orotate                                           | pyrimidines and pyrimidine derivatives     | pyrimidine metabolism                                    |
| pseudouridine                            | pseudouridine, $\beta$ -pseudouridine, psi-uridine                 | nucleoside/nucleotide analogs              | pyrimidine metabolism                                    |
| <b>thymidine</b>                         |                                                                    | pyrimidine nucleosides                     | pyrimidine metabolism                                    |
| <b>thymine</b>                           | 5-methyluracil                                                     | hydroxypyrimidines                         | pyrimidine metabolism                                    |
| <b>uracil</b>                            |                                                                    | pyrimidones                                | pyrimidine metabolism                                    |
| <b>uridine</b>                           |                                                                    | pyrimidine nucleosides                     | pyrimidine metabolism                                    |
| <b>Fatty Acids and Lipid Metabolites</b> |                                                                    |                                            |                                                          |
| 1-monoolein                              | 2,3-dihydroxypropyl oleate, glycerolmonooleate, monooleoylglycerol | lipid; monoacylglycerides                  | lipid metabolism                                         |

|                               |                                                                                         |                                   |                                                                                |
|-------------------------------|-----------------------------------------------------------------------------------------|-----------------------------------|--------------------------------------------------------------------------------|
| 3,4-dihydroxybutyric acid     | 3,4-dihydroxybutanoic acid; 2-deoxytetronic acid                                        | fatty acids (omega hydroxy)       | fatty acid (butyric acid) metabolism                                           |
| 3-hydroxybutyric acid         | 3-hydroxybutanoic acid, $\beta$ -hydroxybutyric acid                                    | beta hydroxy acids                | fatty acid metabolism                                                          |
| 4-hydroxybutyric acid         | 4-hydroxybutanoic acid, $\gamma$ -hydroxybutyric acid                                   | short-chain fatty acid            | fatty acid metabolism (GABA precursor)                                         |
| arachidic acid                | eicosanoic acid                                                                         | long-chain fatty acids            | lipid metabolism                                                               |
| arachidonic acid              | arachidonate                                                                            | long-chain fatty acids            | fatty acid metabolism; arachidonic acid metabolism                             |
| $\beta$ -glycerophosphate     | glycerol-2-phosphate, 2-glycerophosphate                                                | glycerophosphates                 | glycerolipid metabolism                                                        |
| butane-2,3-diol [NIST]        | 2,3-butanediol                                                                          | 1,2-diol, aliphatic hydrocarbon   | gut microbial metabolite                                                       |
| capric acid                   | decanoic acid                                                                           | medium-chain fatty acid           | fatty acid metabolism                                                          |
| <b>cholesterol</b>            |                                                                                         | lipid, sterol                     | lipid metabolism; steroid biosynthesis; bile acid biosynthesis                 |
| citraconic acid               | 2-methylmaleic acid, methylmaleic acid                                                  | methyl-branched-chain fatty acids | microbial metabolite                                                           |
| dodecanol                     | 1-dodecanol                                                                             | fatty alcohols                    | lipid metabolism                                                               |
| ethanolamine                  | 2-aminomethanol                                                                         | aminoalcohol                      | phospholipid biosynthesis                                                      |
| glyceric acid                 | DL-glyceric acid                                                                        | sugar acids and derivatives       | glycerolipid metabolism, amino acid (Gly, Ser) metabolism                      |
| glycerol                      | glycerine                                                                               | sugar alcohols                    | glycerolipid metabolism, CHO (galactose) metabolism                            |
| glycerol-1-phosphate          | glycerol-3-phosphate, glycerol- $\alpha$ -phosphate, glycerophosphoric acid             | glycerophosphates                 | glycerol phosphate shuttle, glycerolipid metabolism, phospholipid biosynthesis |
| <b>glycerol-3-galactoside</b> | glycerol-3-galactose, 3- $\beta$ -D-galactosyl- <i>sn</i> -glycerol, galactosylglycerol | glycosoglycerols                  | glycerolipid metabolism; CHO (galactose) metabolism                            |
| lauric acid                   | dodecanoic acid                                                                         | medium chain fatty acids          | fatty acid metabolism                                                          |
| linoleic acid                 | linolic acid, linoleate                                                                 | fatty acids                       | fatty acid metabolism                                                          |
| myristic acid                 | tetradecanoic acid                                                                      | long-chain fatty acids            | fatty acid metabolism                                                          |
| <b>nonadecanoic acid</b>      |                                                                                         | long-chain fatty acids            | fatty acid metabolism                                                          |
| octadecanol                   | 1-octadecanol, stearyl alcohol                                                          | long-chain fatty alcohols         | glycerophospholipid (plasmalogens) synthesis                                   |
| oleic acid                    | <i>cis</i> -9-octadecenoic acid, <i>cis</i> -oleic acid                                 | long-chain fatty acids            | fatty acid metabolism                                                          |

|                                            |                                                                  |                             |                                                                                                  |
|--------------------------------------------|------------------------------------------------------------------|-----------------------------|--------------------------------------------------------------------------------------------------|
| palmitic acid                              | hexadecanoic acid, palmitate                                     | long-chain fatty acids      | fatty acid metabolism, glycerolipid metabolism                                                   |
| palmitoleic acid                           | <i>cis</i> -9-hexadecenoic acid                                  | long-chain fatty acids      | fatty acid metabolism                                                                            |
| pelargonic acid                            | nonanoic acid, pelargic acid, nonanoate                          | medium-chain fatty acids    | fatty acid metabolism                                                                            |
| stearic acid                               | octadecanoic acid                                                | long-chain fatty acids      | glycerophospholipid (plasmalogens) synthesis                                                     |
| <b>Amino Acids and Protein Derivatives</b> |                                                                  |                             |                                                                                                  |
| 2-hydroxybutyric acid                      | 2-hydroxybutanoic acid, $\alpha$ -hydroxybutyrate                | alpha hydroxy acids         | amino acid catabolism (Thr, Met) and biosynthesis (Cys)<br>melatonin degradation; Trp metabolism |
| 5-methoxytryptamine                        | <i>o</i> -methylserotonin                                        | tryptamines and derivatives | amino acid metabolism, glutathione metabolism                                                    |
| <b>5-oxoproline</b>                        | oxoproline, pyroglutamic acid                                    | alpha amino acids           | amino acid metabolism; urea cycle; multiple pathways                                             |
| alanine                                    | L-alanine                                                        | amino acids                 |                                                                                                  |
| $\alpha$ -aminoadipic acid                 | 2-aminohexanedioic acid; 2-aminoadipic acid                      | alpha-amino acid            | amino acid (Lys) metabolism                                                                      |
| aminomalonate                              | 2-aminomalonic acid, aminomalonic acid                           | alpha-amino acids           | amino acid (Gly, Ala) metabolism                                                                 |
| asparagine                                 | L-asparagine                                                     | amino acids                 | amino acid metabolism                                                                            |
| aspartate                                  | aspartic acid                                                    | amino acids                 | amino acid metabolism; urea cycle                                                                |
| benzoate                                   | benzoic acid                                                     | benzoic acids               | microbial metabolite (Phe)                                                                       |
| $\beta$ -glutamic acid                     | 3-aminopentanedioic acid, 3-aminoglutaric acid, isoglutamic acid | beta-amino acids            | microbial metabolite                                                                             |
| citrulline                                 | L-citrulline                                                     | L-alpha-amino acids         | amino acid metabolism (Arg, Pro, Asp); urea cycle                                                |
| <b>creatinine</b>                          |                                                                  | alpha amino acids           | protein degradation                                                                              |
| cysteine                                   | L-cysteine                                                       | amino acids                 | amino acid metabolism (Cys, Glu, Gly, Ser, Met), glutathione metabolism; taurine metabolism      |
| glutamate                                  | glutamic acid                                                    | amino acids                 | amino acid metabolism                                                                            |
| glutamine                                  | L-glutamine                                                      | amino acids                 | amino acid metabolism                                                                            |
| glutarate                                  | glutaric acid, pentanedioic acid                                 | dicarboxylic acids          | amino acid metabolism (Lys, Trp)                                                                 |
| glycine                                    | 2-aminoacetic acid                                               | amino acids                 | amino acid (Ala, Gly, Ser, Arg, Pro) metabolism, multiple pathways                               |

|                                      |                                                                                                                                    |                                          |                                                                                   |
|--------------------------------------|------------------------------------------------------------------------------------------------------------------------------------|------------------------------------------|-----------------------------------------------------------------------------------|
| <b>hippurate</b>                     | hippuric acid, 2-benzamidoacetic acid                                                                                              | benzoic acids and derivatives            | amino acid (Gly) metabolism                                                       |
| histidine                            | L-histidine                                                                                                                        | amino acids                              | amino (His, $\beta$ -Ala) acid                                                    |
| homoserine                           | L-homoserine                                                                                                                       | amino acids                              | amino acid (Met) metabolism                                                       |
| hydroxylamine                        | hydroxyamine                                                                                                                       | inorganic compound                       | waste product, related to ammonia                                                 |
| <b>indole-3-acetate</b>              | indoleacetic acid, 3-indoleacetic acid                                                                                             | indoxyl carboxylic acids and derivatives | gut microbial metabolite (Trp)                                                    |
| indole-3-lactate                     | indolelactic acid, 3-indolelactate                                                                                                 | indoxyl carboxylic acids and derivatives | amino acid (Trp) metabolism                                                       |
| <b>indole-3-propionate</b>           | indolepropionate, indole-3-propionic acid                                                                                          | indoxyl carboxylic acids and derivatives | gut microbial metabolite (Trp)                                                    |
| isoleucine                           | L-isoleucine                                                                                                                       | amino acids                              | amino acid metabolism                                                             |
| leucine                              | L-leucine                                                                                                                          | amino acids                              | amino acid (Val, Leu, Ile) metabolism                                             |
| lysine                               | L-lysine                                                                                                                           | amino acids                              | amino acid (Lys) metabolism, carnitine synthesis                                  |
| <b>methionine</b>                    | L-methionine                                                                                                                       | amino acids                              | amino acid (Met, Gly, Ser) metabolism                                             |
| methionine sulfoxide                 | L-methionine sulfoxide                                                                                                             | L-alpha-amino acids                      | amino acid (Met) metabolism                                                       |
| ornithine                            | L-ornithine                                                                                                                        | amino acids                              | amino acid (Arg, Pro, Gly, Ser) metabolism, urea cycle                            |
| phenylalanine                        | L-phenylalanine                                                                                                                    | amino acids                              | amino acid (Phe, Tyr) metabolism                                                  |
| <i>p</i> -tolyl glucuronide          | <i>p</i> -cresol glucuronide, <i>p</i> -tolyl-D-glucuronide, <i>p</i> -tolyl- $\beta$ -D-glucuronide, <i>p</i> -cresyl glucuronide | phenolic glycosides                      | microbial metabolite (Tyr)                                                        |
| serine                               | L-serine                                                                                                                           | amino acids                              | amino acid (Gly, Ser, Met) metabolism, sphingolipid metabolism, ammonia recycling |
| <b>taurine</b>                       | 2-aminoethanesulfonic acid, L- <i>taurine</i>                                                                                      | organosulfonic acid, sulfur amino acid   | amino acid (Tau, hypotaurine) metabolism; bile acid biosynthesis                  |
| threonine                            | L-threonine                                                                                                                        | amino acids                              | amino acid (Gly, Ser, Thr) metabolism                                             |
| <b><i>trans</i>-4-hydroxyproline</b> | L-hydroxyproline, 4-hydroxyproline                                                                                                 | proline and derivatives                  | protein (collagen) metabolism                                                     |
| tryptophan                           | L-tryptophan                                                                                                                       | L-alpha-amino acids                      | amino acid (Trp) metabolism                                                       |

|                                                                                 |                                                           |                             |                                                                                                                                                                                                                                    |
|---------------------------------------------------------------------------------|-----------------------------------------------------------|-----------------------------|------------------------------------------------------------------------------------------------------------------------------------------------------------------------------------------------------------------------------------|
| <b>tyrosine</b>                                                                 | L-tyrosine                                                | L-alpha-amino acids         | amino acid (Tyr, Phe) metabolism<br>urea cycle, amino acid (Arg, Pro) metabolism<br>amino acid (Val, Leu, Ile) metabolism                                                                                                          |
| urea                                                                            | isourea, carbamide                                        | ureas                       |                                                                                                                                                                                                                                    |
| valine                                                                          | L-valine                                                  | amino acids                 |                                                                                                                                                                                                                                    |
| <b>Vitamins and Derivatives, Phosphate, and Metabolites of Unknown Function</b> |                                                           |                             |                                                                                                                                                                                                                                    |
| α-tocopherol                                                                    | vitamin E                                                 | tocopherols                 | vitamin<br>ascorbic acid metabolism, glyoxylic acid metabolism<br>vitamins/cofactors                                                                                                                                               |
| oxalate                                                                         | oxalic acid, ethanedioic acid                             | dicarboxylic acids          | ascorbate and aldarate metabolism<br>multiple synthetic and degradative pathways<br>unknown                                                                                                                                        |
| pantothenic acid                                                                | D-pantothenic acid, vitamin B5                            | secondary alcohols          |                                                                                                                                                                                                                                    |
| threonate                                                                       | threonic acid, isothreonic acid                           | sugar acids and derivatives | unknown                                                                                                                                                                                                                            |
| phosphate                                                                       | orthophosphate, phosphate ion, Pi                         | non-metal phosphates        |                                                                                                                                                                                                                                    |
| hydroxycarbamic acid                                                            | hydroxycarbamate<br>methanolphosphate,<br>methylphosphate | monoalkyl phosphates        |                                                                                                                                                                                                                                    |
| methyl dihydrogen phosphate                                                     |                                                           |                             |                                                                                                                                                                                                                                    |
| <b>Sugars, Sugar Acids, Sugar Alcohols, and Carbohydrate Metabolites</b>        |                                                           |                             |                                                                                                                                                                                                                                    |
| 3,6-anhydro-D-galactose <sup>b</sup>                                            | 3,6-anhydrogalactose                                      | hexose                      | CHO metabolism; mouse metabolite<br>glycolysis                                                                                                                                                                                     |
| <b>3-phosphoglycerate</b>                                                       | glycerate-3-phosphate                                     | sugar acids and derivatives |                                                                                                                                                                                                                                    |
| altrose                                                                         | L-altrose                                                 | aldohexose                  | microbial metabolite                                                                                                                                                                                                               |
| arabitol                                                                        | D-arabinitol                                              | polyols (sugar alcohols)    | pentose phosphate pathway                                                                                                                                                                                                          |
| <b>fructose</b>                                                                 | D-fructose, D-fructopyranose                              | pentose                     | carbohydrate (CHO) metabolism<br>glycolysis, gluconeogenesis, CHO metabolism<br>CHO (fructose, mannose) metabolism<br>CHO (glucose) metabolism<br>glucolysis, gluconeogenesis<br>glycolysis, gluconeogenesis,<br>multiple pathways |
| <b>fructose-6-phosphate</b>                                                     |                                                           | hexose phosphate            |                                                                                                                                                                                                                                    |
| fucose                                                                          | L-fucose, 6-deoxy-L-galactose                             | hexose deoxy sugar          | Fructose/mannose degradation,<br>galactose metabolism<br>pentose phosphate pathway                                                                                                                                                 |
| gluconate                                                                       | gluconic acid                                             | sugar acids and derivatives |                                                                                                                                                                                                                                    |
| <b>glucose</b>                                                                  | D-glucose                                                 | hexose                      |                                                                                                                                                                                                                                    |
| <b>glucose-6-phosphate</b>                                                      | D-glucose-6-phosphate                                     | hexose phosphate            |                                                                                                                                                                                                                                    |
| hexitols                                                                        | Multiple hexitols: D-mannitol, D-sorbitol, D-galactitol   | sugar alcohols              |                                                                                                                                                                                                                                    |
| hexose-6-phosphate                                                              | D-hexose 6-phosphate                                      | hexose phosphates           |                                                                                                                                                                                                                                    |

|                                                               |                                                                                                        |                                      |                                                                                                                                                  |
|---------------------------------------------------------------|--------------------------------------------------------------------------------------------------------|--------------------------------------|--------------------------------------------------------------------------------------------------------------------------------------------------|
| hexuronic acids                                               | one of 25 different types: in humans: e.g., glucuronic acid                                            | glucuronic acid derivatives          | CHO (inositol, starch, sucrose) metabolism                                                                                                       |
| isothreonic acid                                              | threonic acid, D-threonic acid                                                                         | sugar acids and derivatives          | microbial metabolite (ascorbic acid)                                                                                                             |
| lactate                                                       | lactic acid                                                                                            | alpha hydroxy acids                  | gluconeogenesis, pyruvate fermentation                                                                                                           |
| lactose                                                       |                                                                                                        | o-glycosyl compounds                 | CHO (lactose, galactose) metabolism                                                                                                              |
| lyxitol                                                       | D-arabinitol                                                                                           | sugar alcohols                       | pentose/glucuronate interconversion pathway                                                                                                      |
| lyxose                                                        | D-lyxose, pectin, galacturonate                                                                        | glucuronic acid derivatives          | pentose phosphate pathway                                                                                                                        |
| mannitol                                                      |                                                                                                        | sugar alcohols                       | CHO (fructose) metabolism                                                                                                                        |
| <b>mannose</b>                                                | D-mannose                                                                                              | hexose                               | CHO (fructose, mannose, galactose) metabolism                                                                                                    |
|                                                               |                                                                                                        |                                      | CHO (galactose) metabolism, phosphatidylinositol phosphate metabolism                                                                            |
| <i>myo</i> -Inositol                                          | L-inositol<br>group of compounds (e.g. <i>N</i> -acetyl-D-glucosamine, <i>N</i> -acetyl-D-mannosamine) | cyclohexanol                         |                                                                                                                                                  |
| <i>N</i> -acetyl-d-hexosamines<br><i>N</i> -acetylmannosamine | <i>N</i> -acetyl-D-mannosamine                                                                         | acylamino sugars<br>acylamino sugars | amino sugar metabolism<br>amino sugar metabolism                                                                                                 |
| <b>phosphoenolpyruvate</b>                                    | phosphoenolpyruvic acid                                                                                | phosphate esters                     | glycolysis, gluconeogenesis, multiple pathways                                                                                                   |
|                                                               |                                                                                                        |                                      | gluconeogenesis, glycolysis, amino sugar metabolism, TCA cycle, amino acid (Ala, Gly, Ser, Cys, Glu) metabolism, pyruvate metabolism, urea cycle |
| pyruvate                                                      | 2-oxopropanoic acid, 2-oxopropionic acid, pyruvic acid                                                 | alpha-keto acids and derivatives     |                                                                                                                                                  |
| ribitol                                                       | <i>meso</i> -adonitol, adonitol                                                                        | sugar alcohols                       | ribose metabolism                                                                                                                                |
| ribonic acid                                                  | D-ribonate                                                                                             | sugar acids and derivatives          | ribose metabolism                                                                                                                                |
| ribose                                                        | D-Ribose, D-ribofuranose                                                                               | pentoses                             | pentose phosphate pathway                                                                                                                        |
| sorbitol                                                      | D-Sorbitol, D-glucitol                                                                                 | sugar alcohols                       | CHO metabolism                                                                                                                                   |
|                                                               |                                                                                                        |                                      | CHO (starch, sucrose, galactose) metabolism                                                                                                      |
| sucrose                                                       |                                                                                                        | o-glycosyl compounds                 |                                                                                                                                                  |
| tagatose                                                      | D-Tagatose                                                                                             | monosaccharides                      | CHO metabolism                                                                                                                                   |
| threitol                                                      | D-Threitol                                                                                             | sugar alcohols                       | CHO (xylose) metabolism                                                                                                                          |
| trehalose                                                     | D-Trehalose, mycose                                                                                    | o-glycosyl compounds                 | CHO (trehalose) degradation                                                                                                                      |
|                                                               |                                                                                                        |                                      |                                                                                                                                                  |
| xylose                                                        | D-xylose                                                                                               | pentoses                             | CHO (anionic polysaccharides) metabolism                                                                                                         |

### Tricarboxylic Acid Cycle Intermediates

|                                                  |                                                                                      |                                                                                 |                                                                                                                                                                                                      |
|--------------------------------------------------|--------------------------------------------------------------------------------------|---------------------------------------------------------------------------------|------------------------------------------------------------------------------------------------------------------------------------------------------------------------------------------------------|
| 2-hydroxyglutarate                               | 2-hydroxyglutaric acid                                                               | short-chain hydroxy acids                                                       | TCA cycle offshoot                                                                                                                                                                                   |
| $\alpha$ -ketoglutarate<br><i>cis</i> -aconitate | 2-ketoglutaric acid, 2-oxoglutaric acid;<br>oxoglutaric acid<br><i>cis</i> -aconitic | gamma-keto acids and derivatives<br>tricarboxylic acids and derivatives         | TCA cycle; multiple pathways<br>TCA cycle                                                                                                                                                            |
| citramalate<br>citrate<br>fumarate               | citramalic acid<br>citric acid<br>fumaric acid, 2-butenedioic acid                   | hydroxy fatty acid<br>tricarboxylic acids and derivatives<br>dicarboxylic acids | TCA cycle (analog of malic acid);<br>amino acid metabolism (Ile)<br>TCA cycle<br>TCA cycle; multiple pathways<br>metabolic acidosis (with oxalic acid,<br>lactic acid); regulation by TCA<br>enzymes |
| glycolate<br>isocitrate                          | glycolic acid, 2-hydroxyacetic acid,<br>isocitric acid                               | alpha-hydroxy acids<br>tricarboxylic acids and derivatives                      | TCA cycle<br>TCA cycle                                                                                                                                                                               |
| itaconic acid                                    | itaconate, 2-methylenesuccinic acid                                                  | branched fatty acids                                                            | TCA cycle (derivative of succinic acid)                                                                                                                                                              |
| <b>malate</b>                                    | malic acid                                                                           | beta hydroxy acids                                                              | TCA cycle, multiple pathways                                                                                                                                                                         |
| <b>succinate</b>                                 | succinic acid, butanedioic acid                                                      | dicarboxylic acids                                                              | TCA cycle, amino acid (Glu, Val,<br>Leu, Ile) glutamate metabolism,<br>carnitine synthesis, ketone body<br>metabolism, fatty acid oxidation                                                          |

### Xenobiotics (food, drugs, environment)

|                                             |                                                         |                              |                        |
|---------------------------------------------|---------------------------------------------------------|------------------------------|------------------------|
| 1,3,5-trimethylcyanuric acid                | cyanuric acid, isocyanuric acid,<br>trihydroxycyanidine | 1,3,5-triazines              | xenobiotic             |
| 2-deoxy-D-ribitol                           | 2-deoxypentitol [NIST]                                  | secondary alcohols           | xenobiotic             |
| 4-methylbenzenesulfonamide <sup>b</sup>     | <i>p</i> -toluenesulfonamide                            | sulfonamide                  | xenobiotic             |
| $\beta$ -sitosterol                         |                                                         | phytosterol                  | xenobiotic             |
| <i>cis</i> -gondoic acid                    | 11Z-eicosenoic acid, gondoic acid                       | long-chain fatty acids       | xenobiotic             |
| conduiritol- $\beta$ -exposide <sup>b</sup> | 1,2-anhydro- <i>myo</i> -inositol                       | conduiritol derivative       | xenobiotic             |
| $\epsilon$ -caprolactam                     | caprolactam, azepan-2-one                               | caprolactams                 | xenobiotic             |
| heptadecanoic acid                          |                                                         | fatty acids (exogenous)      | xenobiotic             |
| isobutene glycol [NIST]                     | 2-methylpropane-1,2-diol                                | primary alcohol, glycol,     | xenobiotic metabolite  |
| lactamide                                   | 2-hydroxypropanamide                                    | monocarboxylic acid amide    | lactic acid derivative |
| lactulose                                   |                                                         | <i>o</i> -glycosyl compounds | xenobiotic             |
| metharbital                                 | methylbarbital                                          | barbituric acid derivatives  | xenobiotic (drug)      |
| pentobarbital [NIST]                        | nembutal                                                | pyrimidones                  | xenobiotic (drug)      |

|             |           |                              |                   |
|-------------|-----------|------------------------------|-------------------|
| pinitol     | D-pinitol | cyclohexanols                | xenobiotic (food) |
| quinic acid | quininate | quinic acids and derivatives | xenobiotic (food) |
| raffinose   | melitose  | oligosaccharides             | xenobiotic (food) |
| xylitol     |           | sugar alcohols               | xenobiotic (food) |

Abbreviations: CHO, carbohydrate; standard 3-letter codes for amino acids; TCA, tricarboxylic acid cycle (aka, citric acid cycle)

<sup>a</sup>Metabolites in bold in colored boxes were included in the set of potential diagnostic biomarkers

<sup>b</sup>Metabolites that have not been found in humans; these were excluded from the set of potential diagnostic biomarkers
