# Supplementary material
Source: PubMed Central journal article supplement (PMC7223005)
Supplement: 11306_2020_1658_MOESM4_ESM.pdf [file 11306_2020_1658_MOESM4_ESM.pdf]

## Electronic Supplementary Material

### New markers for sepsis caused by *Pseudomonas aeruginosa* during burn infection

Moamen M. Elmassry<sup>1</sup>, Nithya S. Mudaliar<sup>2\*</sup>, Jane A. Colmer-Hamood<sup>3,4</sup>, Michael J. San Francisco<sup>1,5</sup>, John A. Griswold<sup>2</sup>, Sharmila Dissanaik<sup>2</sup>, and Abdul N. Hamood<sup>2,3,†</sup>

<sup>1</sup>Department of Biological Sciences, Texas Tech University, Lubbock, TX, USA

<sup>2</sup>Department of Surgery, Texas Tech University Health Sciences Center, Lubbock, TX, USA

<sup>3</sup>Department of Immunology and Molecular Microbiology, Texas Tech University Health Sciences Center, Lubbock, TX, USA

<sup>4</sup>Department of Medical Education, Texas Tech University Health Sciences Center, Lubbock, TX, USA

<sup>5</sup>Honors College, Texas Tech University, Lubbock, TX, USA

\*NM, current address: Caris Life Sciences, Phoenix, AZ, USA

<sup>†</sup>**Corresponding author:** Abdul N. Hamood, PhD; [abdul.hamood@ttuhsc.edu](mailto:abdul.hamood@ttuhsc.edu)

**Online Resource 4: Fig. S1** Relative peak intensities of the 148 identified metabolites

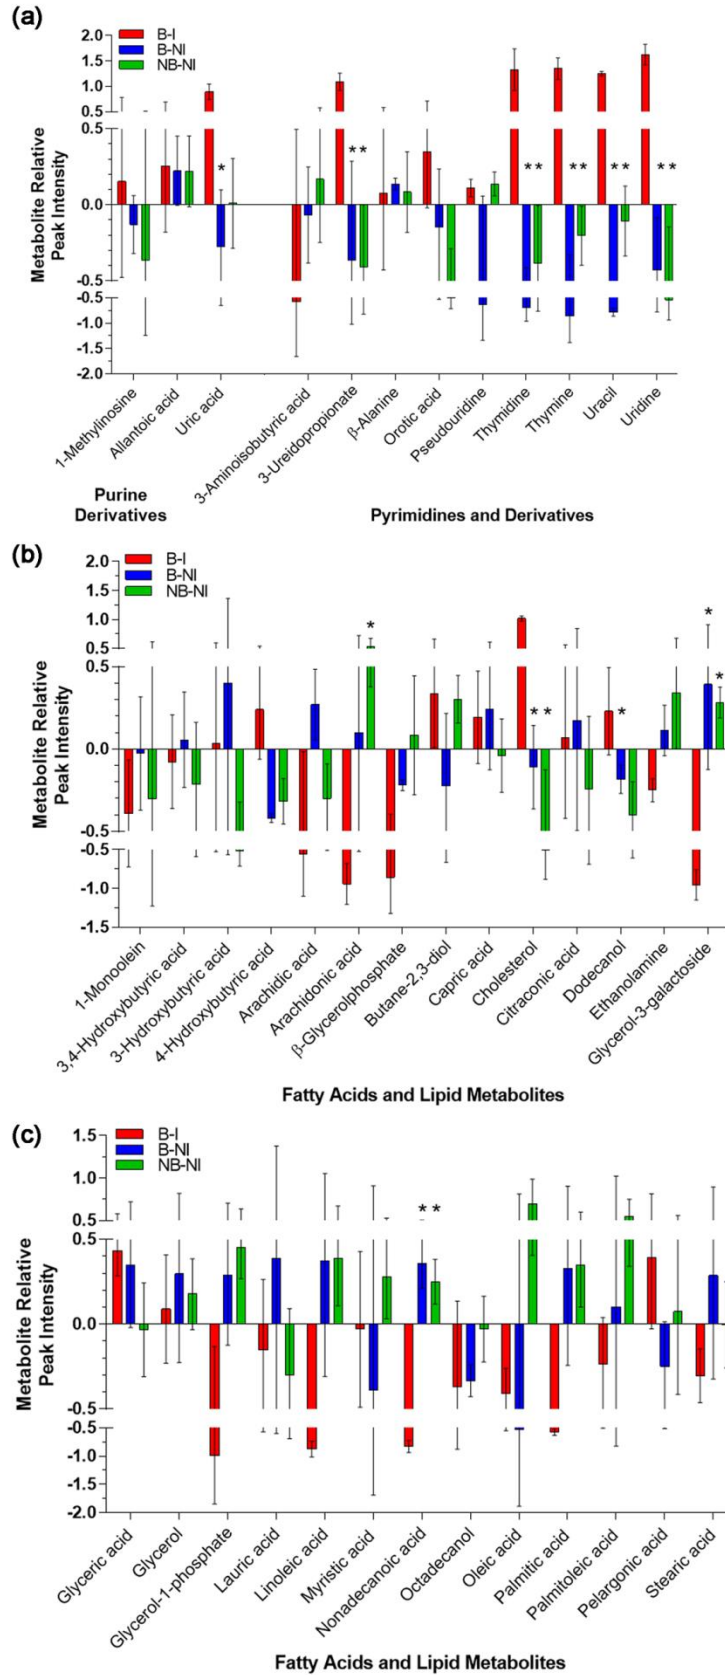

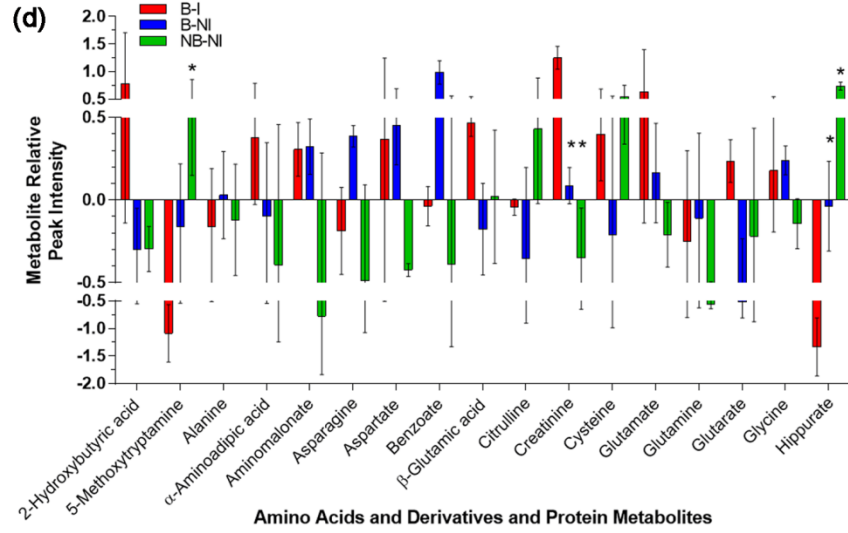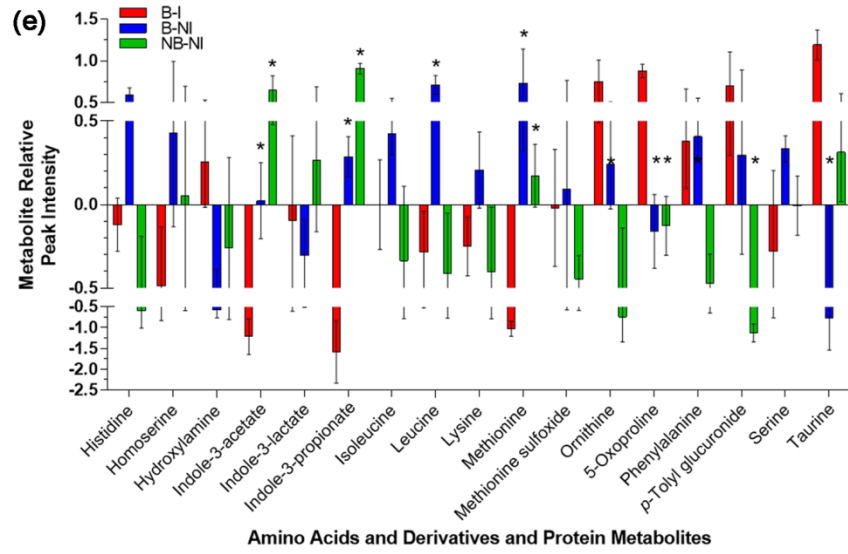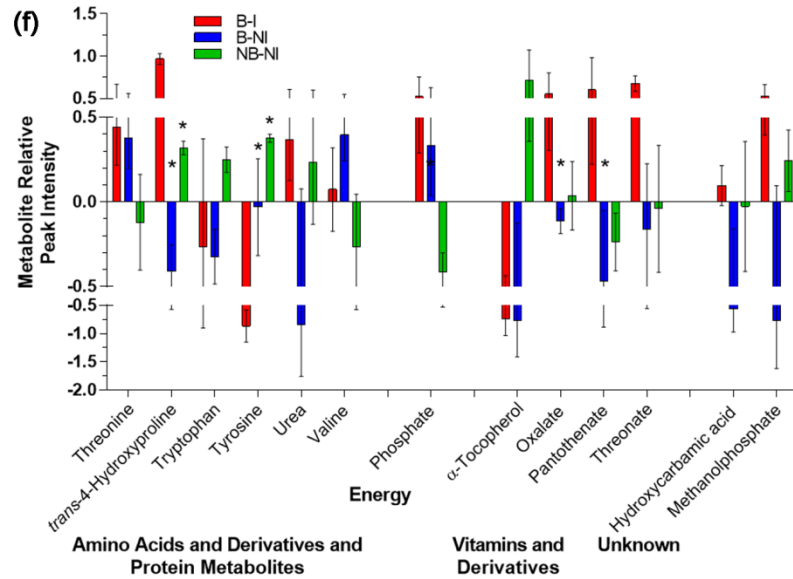

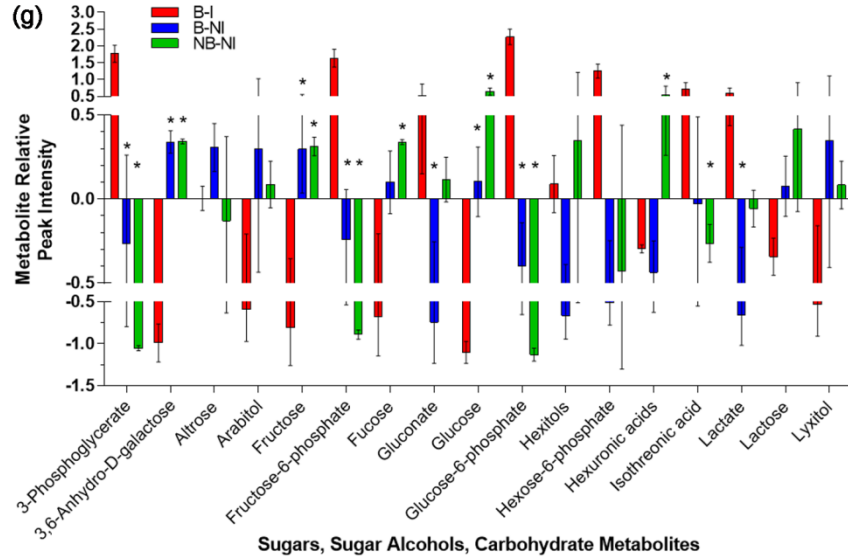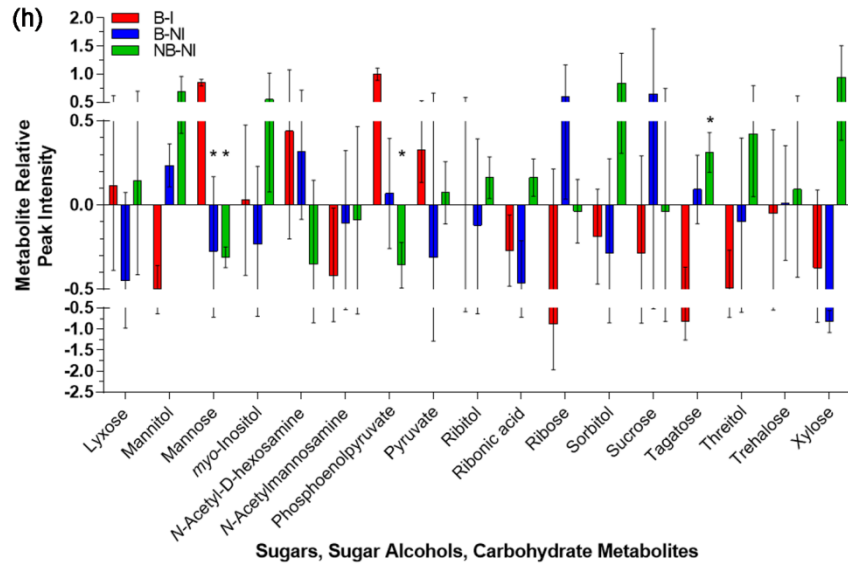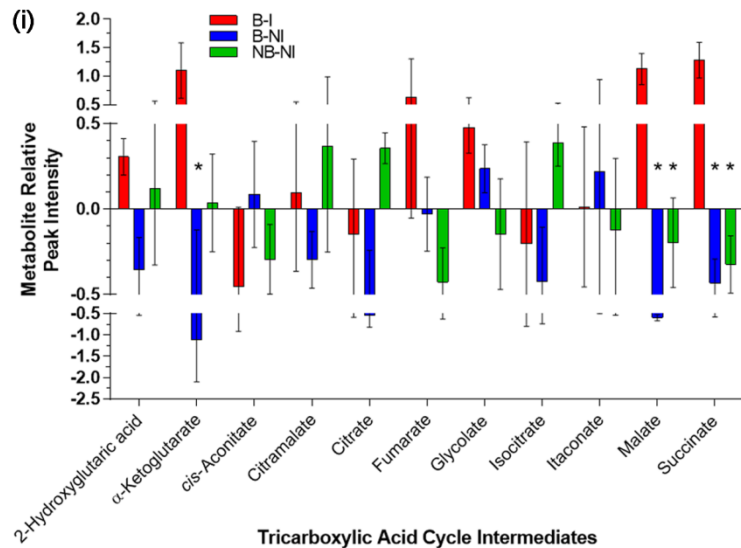

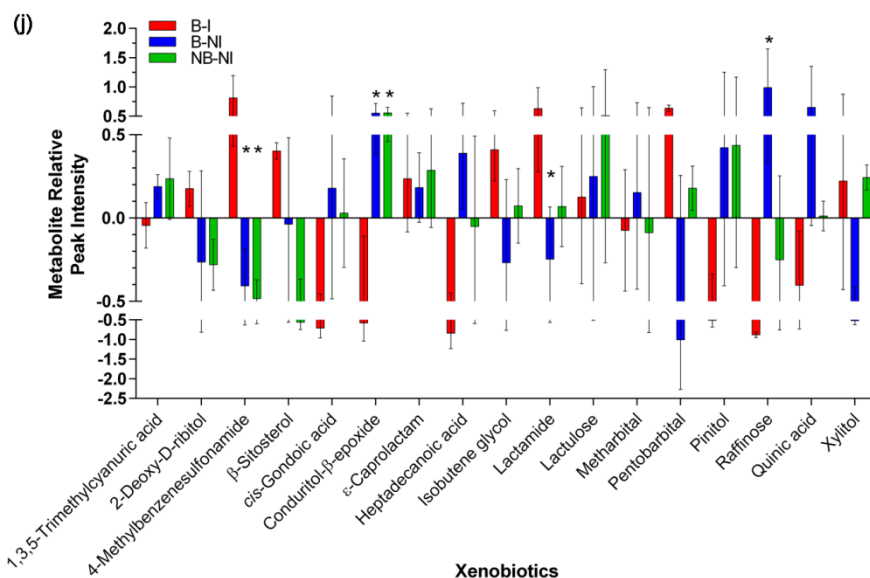

**Fig. S1** Relative peak intensities of the 148 identified metabolites. Peak intensities of the identified metabolites were normalized using vector and median normalization methods. Relative peak intensities were log-transformed and scaled using Pareto scaling in the MetaboAnalyst program (<https://www.metaboanalyst.ca>; accessed 18 Aug 2019) (Chong et al., 2018)<sup>1</sup>. Values shown for the thermally injured/*P. aeruginosa* infected group (B-I), the thermally injured but not infected group (B-NI), and the sham control group (NB-NI) represent means  $\pm$  SEM ( $n = 3$ /group). Asterisk (\*) represents significance of at least  $P < 0.05$  as determined by one-way ANOVA (all pairs) followed by Fisher's least significance difference test. **a** purine and pyrimidine derivatives; **b, c** fatty acids and lipid metabolites; **d, e, f** amino acids and protein metabolites; **f** energy, vitamins and derivatives, unknown function; **g, h** sugars, sugar alcohols, and carbohydrate metabolites; **i** tricarboxylic acid cycle intermediates; **j** xenobiotics

<sup>1</sup>Chong, J., Soufan, O., Li, C., Caraus, I., Li, S., Bourque, G., et al. (2018). MetaboAnalyst 4.0: towards more transparent and integrative metabolomics analysis. *Nucleic Acids Res*, 46(W1), W486-W494. doi:10.1093/nar/gky310.
