# Supplementary material
Source: PubMed Central journal article supplement (PMC7223005)
Supplement: 11306_2020_1658_MOESM5_ESM.pdf [file 11306_2020_1658_MOESM5_ESM.pdf]

## Electronic Supplementary Material

### New markers for sepsis caused by *Pseudomonas aeruginosa* during burn infection

Moamen M. Elmassry<sup>1</sup>, Nithya S. Mudaliar<sup>2\*</sup>, Jane A. Colmer-Hamood<sup>3,4</sup>, Michael J. San Francisco<sup>1,5</sup>, John A. Griswold<sup>2</sup>, Sharmila Dissanaiké<sup>2</sup>, and Abdul N. Hamood<sup>2,3,†</sup>

<sup>1</sup>Department of Biological Sciences, Texas Tech University, Lubbock, TX, USA

<sup>2</sup>Department of Surgery, Texas Tech University Health Sciences Center, Lubbock, TX, USA

<sup>3</sup>Department of Immunology and Molecular Microbiology, Texas Tech University Health Sciences Center, Lubbock, TX, USA

<sup>4</sup>Department of Medical Education, Texas Tech University Health Sciences Center, Lubbock, TX, USA

<sup>5</sup>Honors College, Texas Tech University, Lubbock, TX, USA

\*NM, current address: Caris Life Sciences, Phoenix, AZ, USA

†**Corresponding author:** Abdul N. Hamood, PhD; [abdul.hamood@ttuhsc.edu](mailto:abdul.hamood@ttuhsc.edu)

**Online Resource 5: Fig. S2** Box-and-whisker plots of the 21 metabolites that did not distinguish *Pa*-sepsis from niSIRS

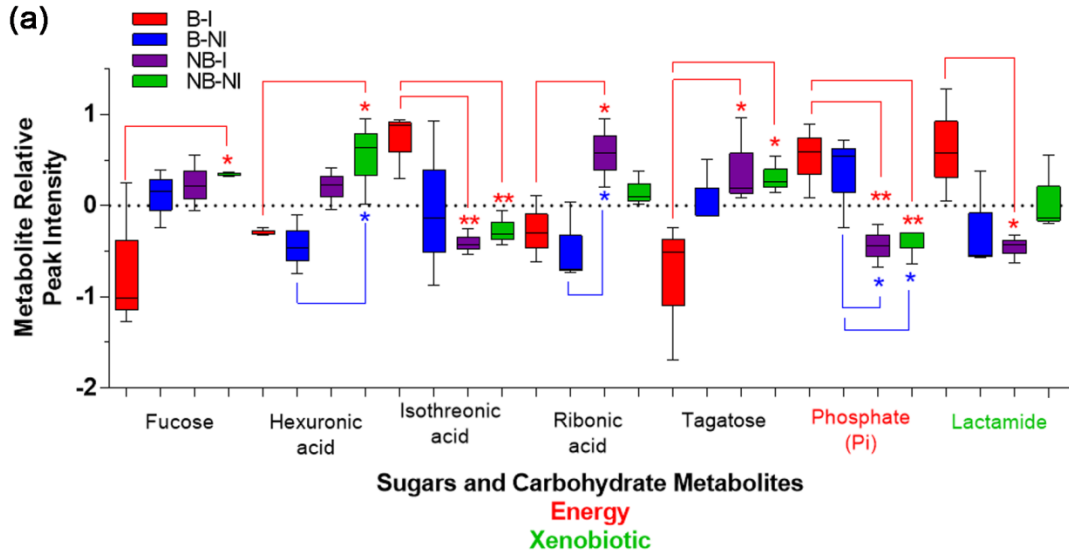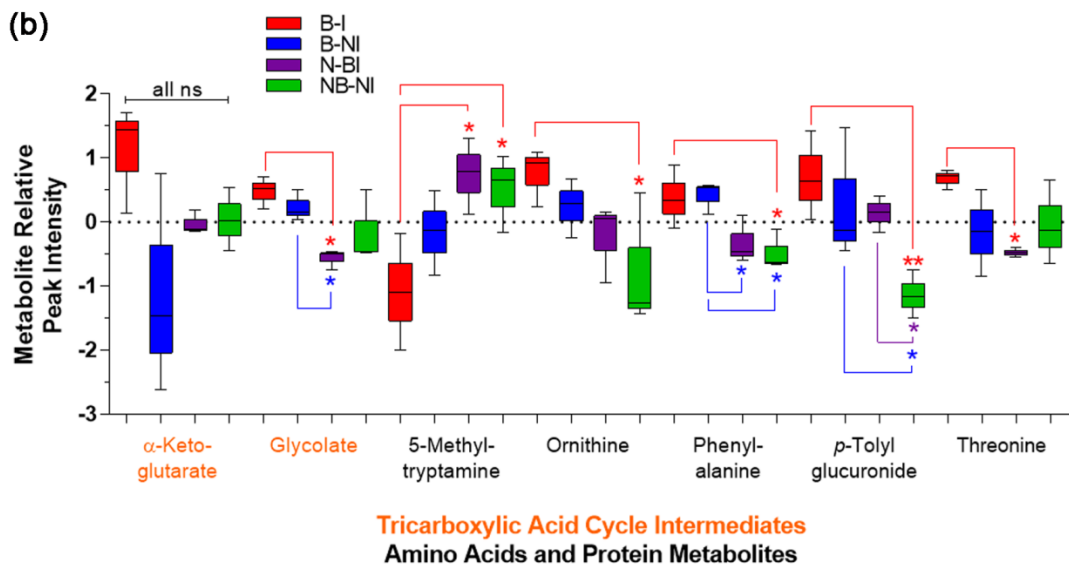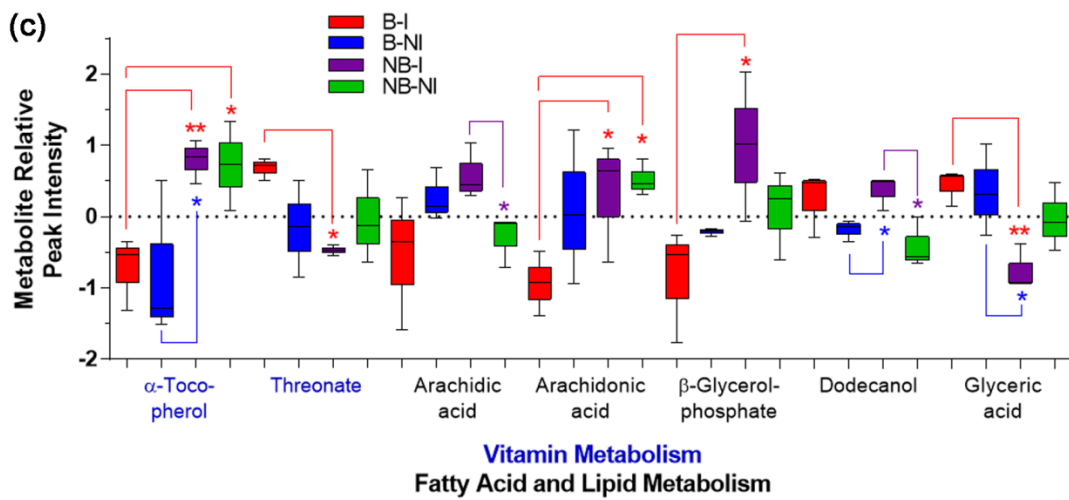

**Fig. S2** Box-and-whisker plots of the 21 metabolites that did not distinguish *Pa*-sepsis from niSIRS. Evaluation of those 21 metabolites that did not distinguish B-I (thermally injured/*P. aeruginosa* infected; *Pa*-sepsis) from B-NI (thermally injured/not infected; niSIRS). Peak intensities were normalized using vector and median normalization methods and significance was determined using one-way ANOVA using B-I as the comparator to NB-I (no thermal injury/*P. aeruginosa* infected) and NB-NI (noninjured and noninfected control; healthy), BN-I as the comparator to NB-I and NB-NI, and B-I, BN-I and NB-I without NB-NI. This analysis was followed by Fisher's least significant difference test; ns, no significance; \*,  $P < 0.05$ ; \*\*,  $P < 0.01$ . Each box plot represents 3 biological samples and whiskers represent their distribution. **a** sugars and carbohydrate metabolites, energy metabolite (Pi), and xenobiotic; **b** tricarboxylic acid cycle intermediates and amino acids and protein metabolites; **c** vitamins and metabolites and fatty acid and lipid metabolites. There are different patterns of discrimination among the metabolites – B-I from NB-NI and B-I from NB-I, B-NI from NB-I and B-NI from NB-NI, and even NB-I from NB-NI. Further investigation will be necessary to determine if these metabolites would be useful in discriminating between individuals with niSIRS related to trauma or other causes and those with infections who do not manifest sepsis
